# Supplementary material for: Convalescent Plasma for Preventing Critical Illness in COVID-19: a Phase 2 Trial and Immune Profile
Source: PubMed Central journal article supplement (PMC8865433; doi:10.1128/spectrum.02560-21), 2022-02-23
Supplement: spectrum02560-21_supp_1_seq4.pdf [file spectrum02560-21_supp_1_seq4.pdf]

## SUPPLEMENTAL MATERIAL

### SUPPLEMENTAL TABLES

**Supplemental Table 1.** Participants reporting at least 1 adverse event.

| Adverse Event                 | Convalescent Plasma Recipients (N=29) |
|-------------------------------|---------------------------------------|
| Any event, n (%) <sup>*</sup> | 11 (38)                               |
| Related adverse event         | 4 (14)                                |
| Severe ( $\geq$ grade 3)      | 8 (28)                                |
| Life-threatening (grade 4)    | 3 (10)                                |
| Any serious adverse event     | 4 (14)                                |
| Related serious adverse event | 0                                     |
| Severe ( $\geq$ grade 3)      | 4 (14)                                |
| Life-threatening (grade 4)    | 3 (10)                                |
| Death                         | 2 (7)                                 |

\* Unique adverse events included pulmonary edema (n=6 occurrences in 5 participants), acute respiratory failure (n=4), fever (n=3), hypoxia (n=1) elevated aspartate aminotransferase (n=1), elevated alanine aminotransferase (n=1) atrial fibrillation with rapid ventricular response (n=1), elevated creatinine (n=1), epistaxis (n=1), hypertensive urgency (n=1), hypotension (n=1), sepsis (n=1), worsening sepsis (n=1), syncope (n=1).

**Supplemental Table 2.** Comparison of specific antibodies in CIP recipients over time.

|              |                       | Day 0                      | Day 7                       |         | Day 14                        |         | Day 28                      |         |
|--------------|-----------------------|----------------------------|-----------------------------|---------|-------------------------------|---------|-----------------------------|---------|
|              |                       |                            |                             | p value |                               | p value |                             | p value |
| <b>Spike</b> | <b>IgG</b><br>(µg/ml) | <b>1.9</b><br>(0.065-6.6)  | <b>35.0</b><br>(13.0-64.0)  | <0.0001 | <b>53.0</b><br>(20.0-83.0)    | <0.0001 | <b>58.0</b><br>(34.0-90.0)  | <0.0001 |
|              | <b>IgM</b><br>(EU/ml) | <b>3.4</b><br>(1.45-10.0)  | <b>23.9</b><br>(17.10-45.4) | <0.0001 | <b>22.55</b><br>(11.33-31.33) | <0.0001 | <b>11.70</b><br>(8.5-22.50) | 0.0002  |
|              | <b>IgA</b><br>(EU/ml) | <b>4.8</b><br>(1.15-13.15) | <b>23.0</b><br>(18.7-31.8)  | <0.0001 | <b>22.75</b><br>(14.78-38.5)  | <0.0001 | <b>19.0</b><br>(10.0-25.7)  | <0.0001 |
| <b>RBD</b>   | <b>IgG</b><br>(µg/ml) | <b>2.26</b><br>(0.28-10.8) | <b>17.9</b><br>(5.54-39.13) | <0.0001 | <b>38.1</b><br>(12.02-53.87)  | <0.0001 | <b>42.8</b><br>(9.68-81.82) | <0.0001 |
|              | <b>IgM</b><br>(EU/ml) | <b>3.4</b><br>(1.4-10.6)   | <b>25.6</b><br>(14.3-40.6)  | <0.0001 | <b>16.4</b><br>(9.6-26.25)    | <0.0001 | <b>9.6</b><br>(3.1-20.9)    | 0.0037  |
|              | <b>IgA</b><br>(EU/ml) | <b>2.9</b><br>(0.7-9.6)    | <b>16.2</b><br>(9.9-29.0)   | <0.0001 | <b>15.5</b><br>(11.73-27.43)  | <0.0001 | <b>10.1</b><br>(5.7-17.8)   | 0.0002  |
| <b>NC</b>    | <b>IgG</b><br>(EU/ml) | <b>2.4</b><br>(0.9-5.7)    | <b>6.7</b><br>(3.4-27.50)   | 0.0022  | <b>8.7</b><br>(3.3-33.13)     | 0.0067  | <b>6.2</b><br>(3.4-20.90)   | 0.0033  |
|              | <b>IgM</b><br>(EU/ml) | <b>3.9</b><br>(2.0-9.55)   | <b>14.2</b><br>(8.5-21.0)   | <0.0001 | <b>10.0</b><br>(5.2-16.68)    | 0.0005  | <b>4.8</b><br>(2.7-10.2)    | 0.0079  |
|              | <b>IgA</b><br>(EU/ml) | <b>1.1</b><br>(0.1-3.7)    | <b>3.7</b><br>(1.7-10.0)    | <0.0001 | <b>4.2</b><br>(1.75-12.08)    | 0.0024  | <b>2.6</b><br>(1.1-4.3)     | 0.6320  |

Wilcoxon rank sum was used to compare baseline levels with day 7, 14, and 28 levels of each specific antibody. Mean and range are listed. n = 25.

**Supplemental Table 3.** Univariate Cox regression analysis examining the correlation between CIP antibody levels and time to ICU transfer.

| Variable      | Hazard Ratio (HR) | Std.Err. | z      | P value | Lower 95% CI of HR | Upper 95% CI of HR |
|---------------|-------------------|----------|--------|---------|--------------------|--------------------|
| IgG Spike CIP | 1.014             | 0.01521  | 0.911  | 0.362   | 0.984              | 1.044              |
| IgG RBD CIP   | 1.008             | 0.02256  | 0.371  | 0.711   | 0.965              | 1.054              |
| IgG NC CIP    | 0.949             | 0.261    | -0.192 | 0.848   | 0.553              | 1.626              |
| IgM Spike CIP | 1.017             | 0.01451  | 1.206  | 0.228   | 0.989              | 1.046              |
| IgM RBD CIP   | 1.144             | 0.06807  | 2.254  | 0.024*  | 1.018              | 1.285              |
| IgM NC CIP    | 1.190             | 0.1885   | 1.098  | 0.272   | 0.872              | 1.623              |
| IgA Spike CIP | 1.042             | 0.04789  | 0.901  | 0.367   | 0.953              | 1.140              |
| IgA RBD CIP   | 1.058             | 0.08371  | 0.711  | 0.477   | 0.906              | 1.235              |
| IgA NC CIP    | 1.920             | 1.016    | 1.234  | 0.217   | 0.681              | 5.415              |

Levels of all SARS-CoV-2-specific antibodies measured in CIP were tested for association with time to ICU transfer. N=25. Std. Err = standard error.

**Supplemental Table 4.** Univariate Cox regression analysis for baseline antibody titers and time to ICU.

| Variables | Hazard Ratio (HR) | Std. Err. | z      | P-value | Lower 95% CI of HR | Upper 95% CI of HR |
|-----------|-------------------|-----------|--------|---------|--------------------|--------------------|
| IgG Spike | 0.922             | 0.142     | -0.530 | 0.599   | 0.682              | 1.248              |
| IgM Spike | 0.945             | 0.096     | -0.560 | 0.578   | 0.775              | 1.153              |
| IgA Spike | 0.910             | 0.106     | -0.810 | 0.417   | 0.725              | 1.143              |
| IgG RBD   | 1.041             | 0.060     | 0.690  | 0.488   | 0.929              | 1.167              |
| IgM RBD   | 0.895             | 0.129     | -0.770 | 0.439   | 0.675              | 1.186              |
| IgA RBD   | 0.747             | 0.209     | -1.040 | 0.296   | 0.431              | 1.292              |
| IgG NC    | 0.918             | 0.148     | -0.530 | 0.597   | 0.670              | 1.258              |
| IgM NC    | 0.850             | 0.159     | -0.870 | 0.385   | 0.589              | 1.226              |
| IgA NC    | 0.447             | 0.364     | -0.990 | 0.323   | 0.090              | 2.209              |

Levels of all SARS-CoV-2-specific antibodies measured from patient plasma at baseline, prior to CIP infusion, were tested for association with time to ICU transfer.

N=25. Std. Err = standard error.

**Supplemental Table 5:** Univariate Cox regression analysis examining the correlation between CIP antibody levels and time to PCR negativity.

| Variable      | Hazard Ratio (HR) | Std.Err. | z      | P value | Lower 95% CI of HR | Upper 95% CI of HR |
|---------------|-------------------|----------|--------|---------|--------------------|--------------------|
| IgG Spike CIP | 1.014             | 0.009    | 1.554  | 0.120   | 0.996              | 1.033              |
| IgG RBD CIP   | 1.006             | 0.015    | 0.423  | 0.672   | 0.978              | 1.036              |
| IgG NC CIP    | 0.924             | 0.116    | -0.635 | 0.526   | 0.723              | 1.181              |
| IgM Spike CIP | 0.970             | 0.038    | -0.785 | 0.432   | 0.899              | 1.047              |
| IgM RBD CIP   | 0.993             | 0.044    | -0.148 | 0.882   | 0.910              | 1.084              |
| IgM NC CIP    | 0.950             | 0.091    | -0.533 | 0.594   | 0.788              | 1.146              |
| IgA Spike CIP | 0.964             | 0.033    | -1.075 | 0.283   | 0.901              | 1.031              |
| IgA RBD CIP   | 1.056             | 0.043    | 1.343  | 0.179   | 0.975              | 1.144              |
| IgA NC CIP    | 0.701             | 0.244    | -1.022 | 0.307   | 0.355              | 1.385              |

Levels of all SARS-CoV-2-specific antibodies measured in CIP were tested for association with time to ICU transfer. N=25. Std. Err = standard error.

**Supplemental Table 6.** Univariate Cox regression analysis for baseline antibody titers and time to PCR negativity.

| Variables | Hazard Ratio (HR) | Std. Err. | z      | P-value | Lower 95% CI of HR | Upper 95% CI of HR |
|-----------|-------------------|-----------|--------|---------|--------------------|--------------------|
| IgG Spike | 1.016             | 0.035     | 0.460  | 0.646   | 0.950              | 1.086              |
| IgM Spike | 1.005             | 0.031     | 0.160  | 0.872   | 0.947              | 1.067              |
| IgA Spike | 1.003             | 0.032     | 0.090  | 0.931   | 0.941              | 1.069              |
| IgG RBD   | 0.957             | 0.044     | -0.960 | 0.338   | 0.875              | 1.047              |
| IgM RBD   | 1.013             | 0.034     | 0.390  | 0.698   | 0.949              | 1.081              |
| IgA RBD   | 0.918             | 0.064     | -1.230 | 0.218   | 0.801              | 1.052              |
| IgG NC    | 0.920             | 0.063     | -1.220 | 0.223   | 0.805              | 1.052              |
| IgM NC    | 0.949             | 0.049     | -1.010 | 0.312   | 0.857              | 1.051              |
| IgA NC    | 0.876             | 0.100     | -1.160 | 0.248   | 0.700              | 1.097              |

Levels of all SARS-CoV-2-specific antibodies measured from patient plasma at baseline, prior to CIP infusion, were tested for association with time to ICU transfer.

N=25. Std. Err = standard error.

**Supplemental Table 7.** Cox regression analyses for time to negative PCR result.

| A. Univariate Cox regression analysis for time to negative PCR (N=48)   |              |           |        |       |                    |                    |
|-------------------------------------------------------------------------|--------------|-----------|--------|-------|--------------------|--------------------|
| Variables                                                               | Hazard Ratio | Std. Err. | z      | P>z   | Lower 95% CI of HR | Upper 95% CI of HR |
| CIPT                                                                    | 1.672        | 0.710     | 1.210  | 0.226 | 0.727              | 3.843              |
| age                                                                     | 0.988        | 0.014     | -0.810 | 0.419 | 0.961              | 1.017              |
| sex (F vs. M)                                                           | 1.447        | 0.573     | 0.930  | 0.351 | 0.666              | 3.143              |
| hypertension                                                            | 0.274        | 0.114     | -3.120 | 0.002 | 0.122              | 0.619              |
| diabetes                                                                | 0.944        | 0.391     | -0.140 | 0.889 | 0.419              | 2.126              |
| BMI                                                                     | 0.994        | 0.018     | -0.360 | 0.718 | 0.959              | 1.029              |
| obese                                                                   | 1.925        | 1.065     | 1.180  | 0.237 | 0.651              | 5.694              |
| remdesivir                                                              | 0.650        | 0.288     | -0.970 | 0.330 | 0.273              | 1.548              |
| dexamethasone                                                           | 0.569        | 0.222     | -1.450 | 0.148 | 0.265              | 1.222              |
| ACE inhibitor use                                                       | 0.298        | 0.141     | -2.560 | 0.011 | 0.118              | 0.753              |
| B. Multivariate Cox regression analysis for time to negative PCR (N=45) |              |           |        |       |                    |                    |
| Variables                                                               | Hazard Ratio | Std. Err. | z      | P>z   | Lower 95% CI of HR | Upper 95% CI of HR |
| CIPT                                                                    | 0.597        | 0.309     | -0.990 | 0.320 | 0.216              | 1.649              |
| age                                                                     | 0.991        | 0.018     | -0.480 | 0.632 | 0.956              | 1.028              |
| Sex (F vs. M)                                                           | 1.247        | 0.548     | 0.500  | 0.616 | 0.527              | 2.949              |
| hypertension                                                            | 0.244        | 0.139     | -2.480 | 0.013 | 0.080              | 0.743              |
| diabetes                                                                | 2.910        | 1.844     | 1.690  | 0.092 | 0.841              | 10.073             |
| ACE inhibitor use                                                       | 0.295        | 0.174     | -2.070 | 0.038 | 0.093              | 0.936              |

Univariate (A) and multivariate (B) cox regression analyses were performed to determine the potential association of clinical variables with time to negative PCR result.

Std. Err. = standard error. N=48 for univariate analyses, N=45 for multivariate analysis.

## SUPPLEMENTAL FIGURES

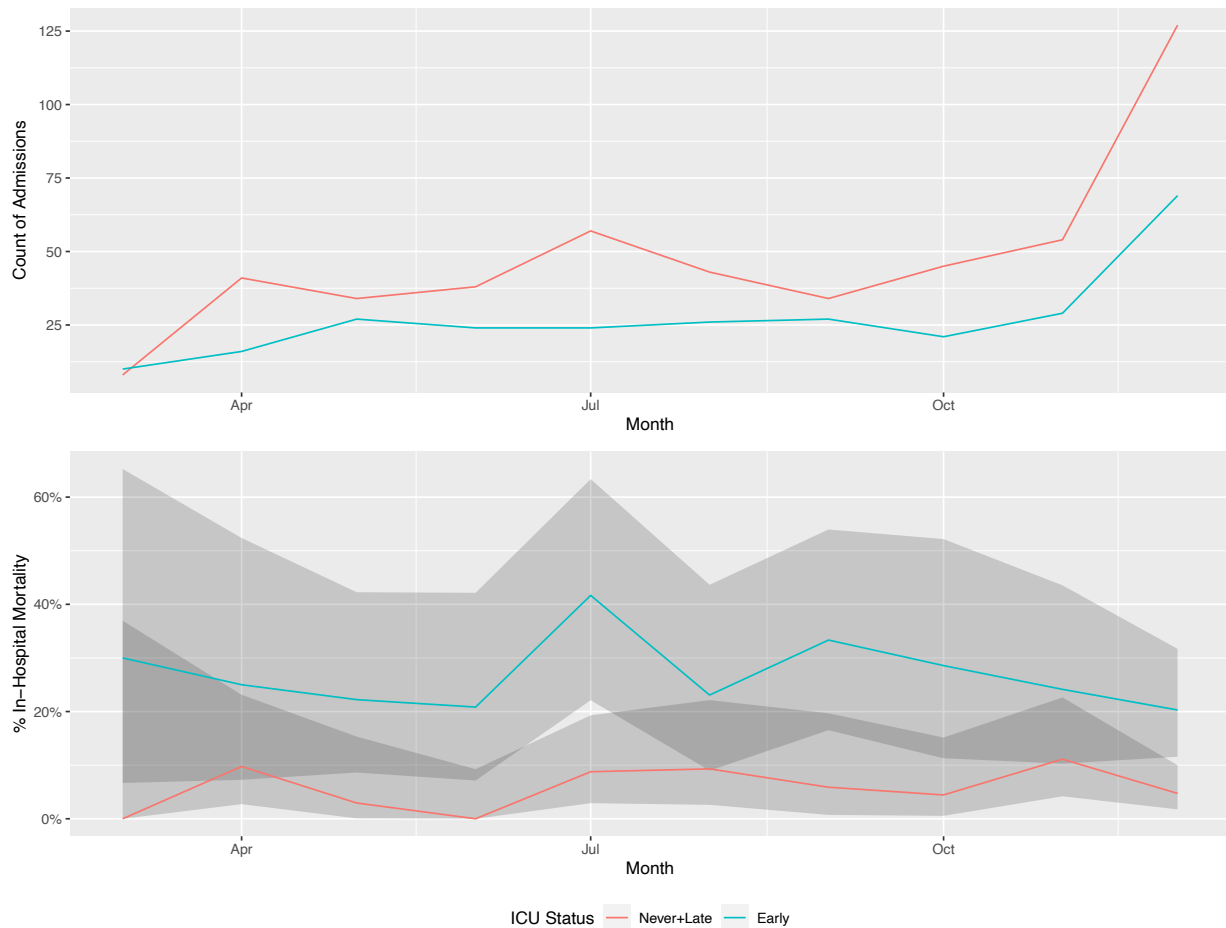

**Supplemental Figure 1:** COVID-19 case counts and in-hospital mortality throughout the study period in 2020 as determined by extraction from the clinical data warehouse. ICU status never + late refers to cases admitted to a floor bed and either never transferred to the ICU or transferred greater than 24 hours after admission. ICU status early refers to those cases admitted directly to the ICU or transferred to the ICU within 24 hours of admission. Gray bands indicate 95% confidence intervals. Chi-squared test for mortality as determined by month of admission,  $p=0.4523$ .



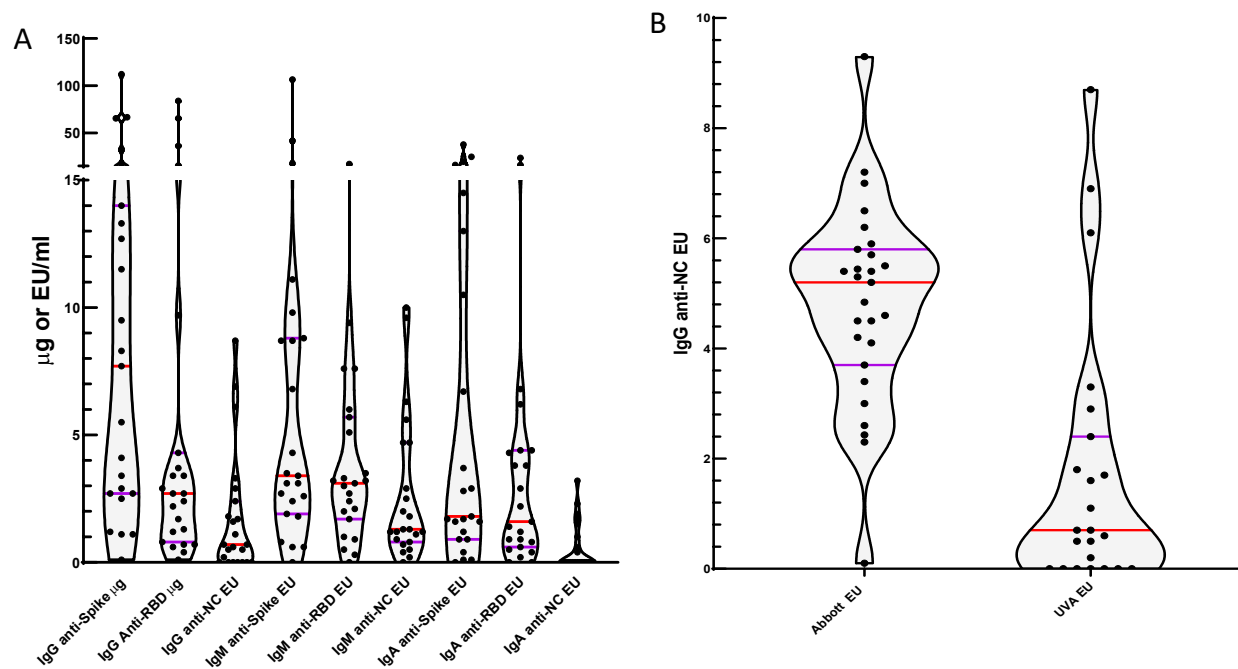

**Supplemental Figure 2:** Levels of Specific antibodies in CIP (n=28). A) Levels ( $\mu\text{g}$  or ELISA Units(EU)/ml) in UVA assays for IgG, IgM, and IgA anti-spike, receptor binding domain (RBD) , and nucleocapsid (NC). B) Levels of IgG anti-NC in Abbott assay with signal/cut-off (S/CO) values and UVA ELISA (EU/ml). Medians and 25<sup>th</sup> and 75<sup>th</sup> percentiles are shown.

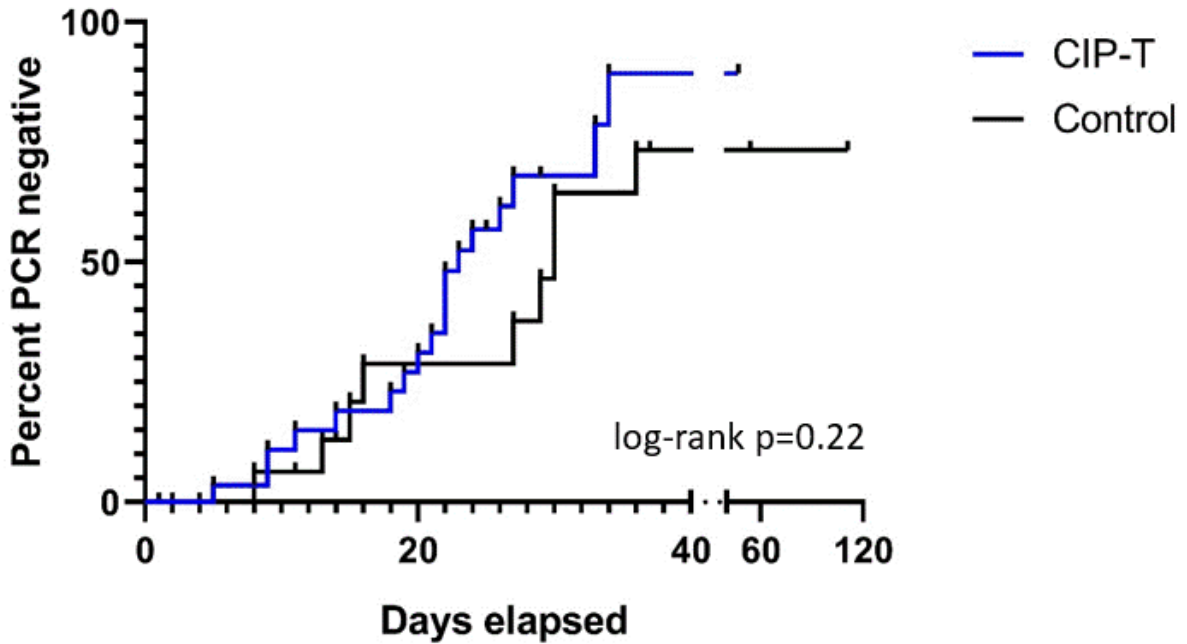

**Supplemental Figure 3.** Respiratory tract viral clearance. Serial respiratory tract swabs were obtained on CIP participants at baseline, 4, 7, 14, and 21 days post-transfusion. Time to first negative PCR was compared to controls with greater than 1 PCR performed following admission.
